# Supplementary material
Source: publisher figshare collection journal article supplement (https://acs.figshare.com/ndownloader/files/6947273)
Supplement: Supplementary file 1 [file 6947273]

## Wireless Synthesis and Activation of Electrochemiluminescent

### Thermoresponsive Janus Objects Using Bipolar Electrochemistry.

Oranit Phuakkong<sup>1,2,3</sup>, Milica Sentic<sup>1</sup>, Haidong Li<sup>1</sup>, Chompunuch Warakulwit<sup>2,3</sup>, Jumras

Limtrakul<sup>4</sup>, Neso Sojic<sup>1</sup>, Alexander Kuhn<sup>1</sup>, Valérie Ravaine<sup>1</sup>, Dodzi Zigah<sup>1\*</sup>

<sup>1</sup>Univ. Bordeaux, ISM, CNRS UMR 5255, F-33400 Talence, France

<sup>2</sup>Department of Chemistry, Faculty of Science, Kasetsart University, Bangkok 10900, Thailand

<sup>3</sup>NANOTEC Center for Nanoscale Materials Design for Green Nanotechnology and Center for Advanced Studies in Nanotechnology and its Applications in Chemical, Food and Agricultural Industries, Kasetsart University, Bangkok 10900, Thailand

<sup>4</sup>Department of Materials Science and Engineering, School of Molecular Science and Engineering, Vidyasirimedhi Institute of Science and Technology, Rayong 21210, Thailand

#### Supporting Information

The potential scan rate was  $0.1 \text{ V s}^{-1}$ . Figure S1 shows the cyclic voltammogram of persulfate anions with NIPAM in  $0.1 \text{ M KNO}_3$  water solution on glassy carbon electrodes.

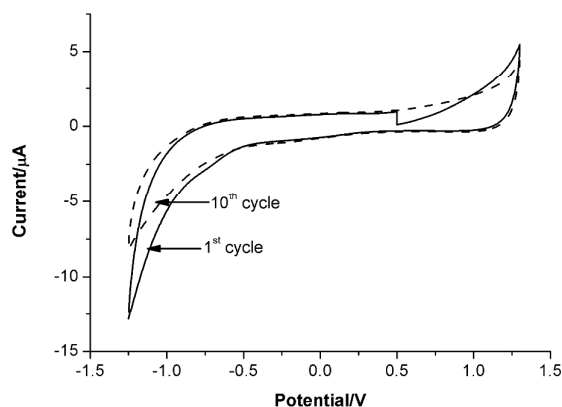

**Figure S1** CV of electrodeposition. Cyclic voltammogram of  $0.1 \text{ M KNO}_3 + 0.5 \text{ M NIPAM} + 0.015 \text{ M S}_2\text{O}_8^{2-}$



a)

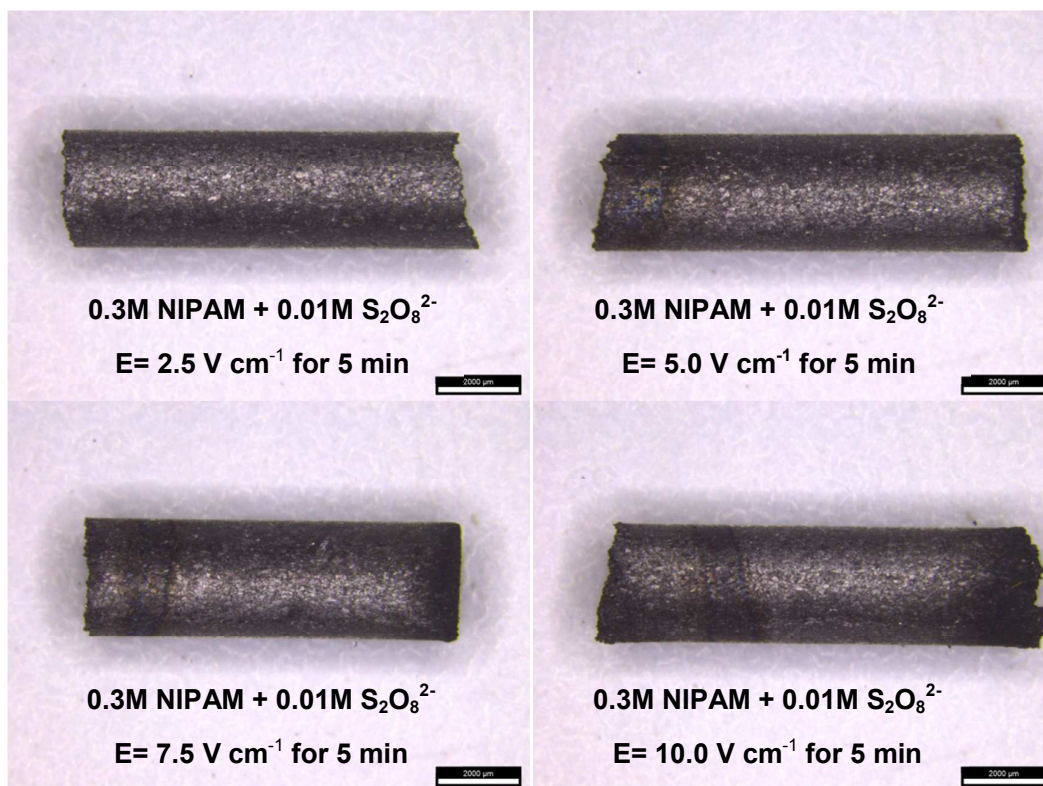

b)

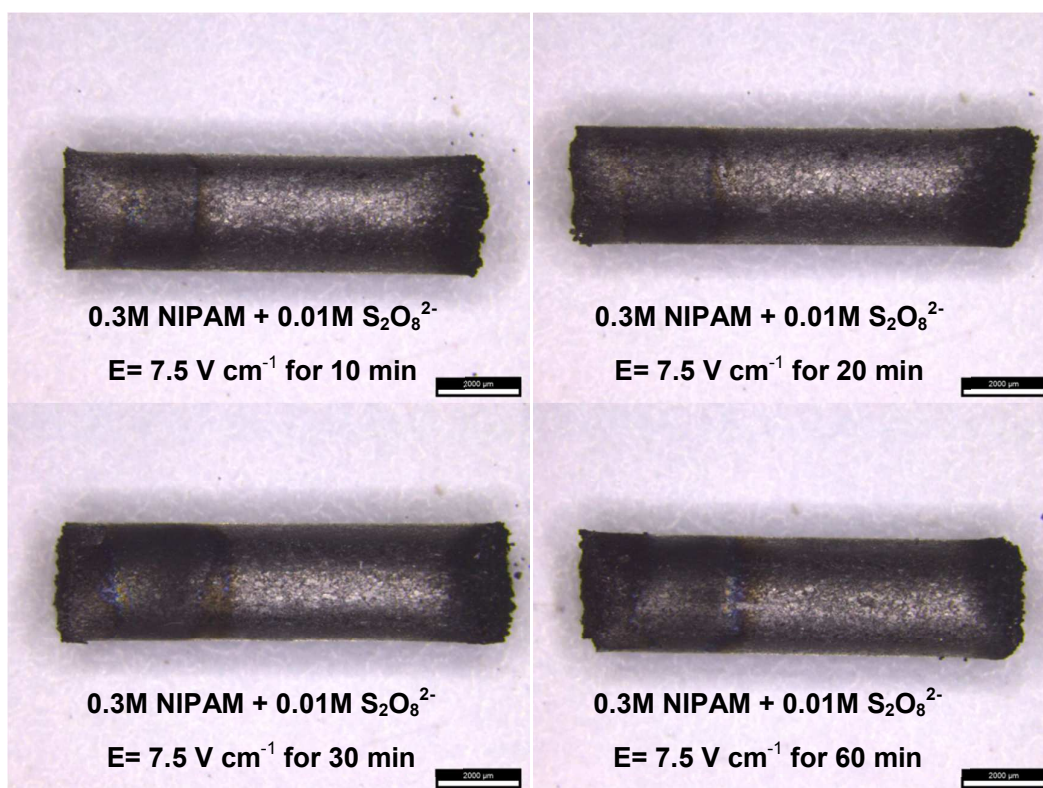

**Figure S2** Images of the pNIPAM deposited on graphite rod at a) different potentials and b) deposition times

a)

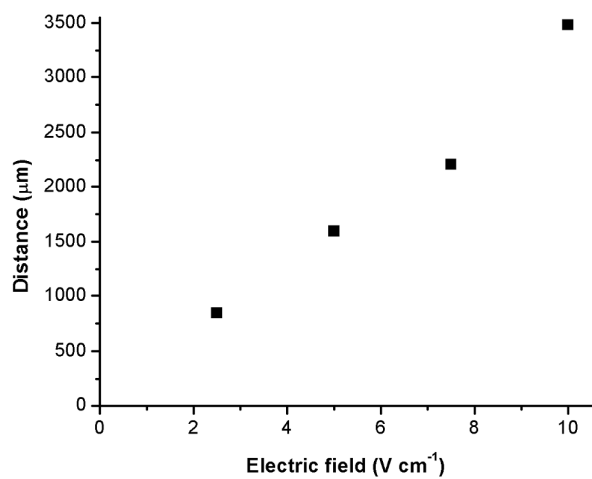

**Figure S3 :** Variation of the distance between the end of the graphite rod and the middle of the polymer band. In function of the electric fields for  $t = 5$  min

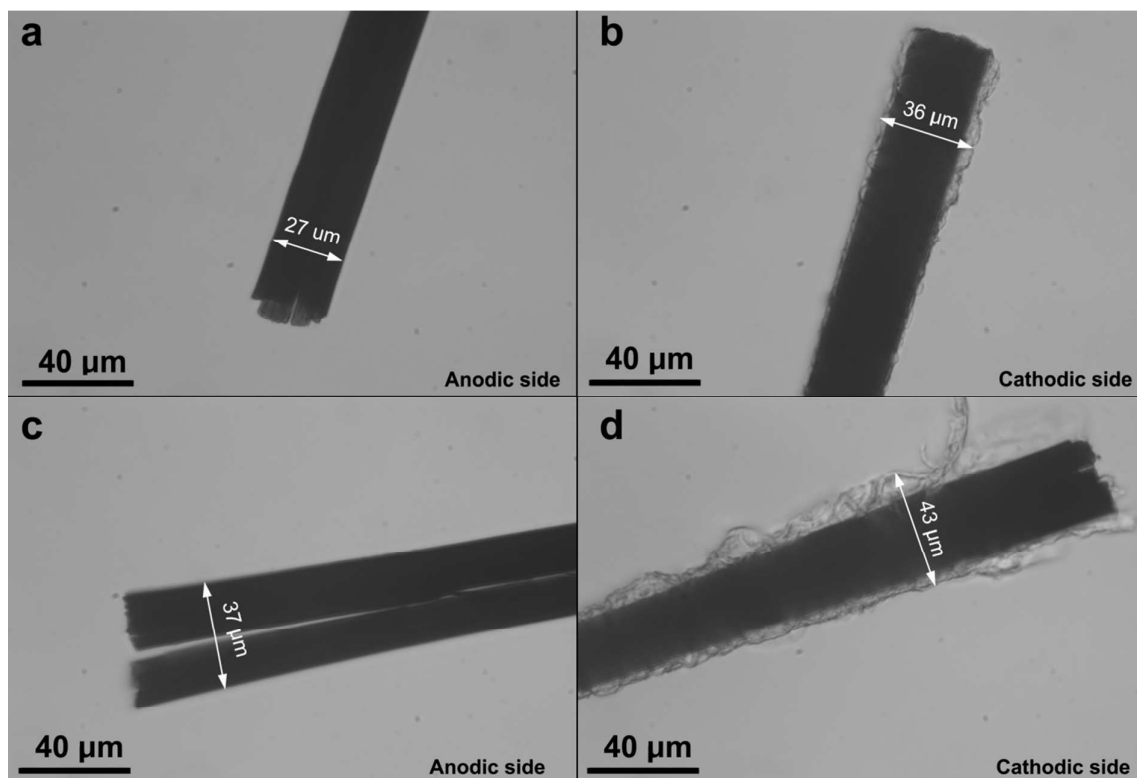

**Figure S4** The optical image of the anodic and cathodic side of carbon fiber after electropolymerization at  $5 \text{ V cm}^{-1}$  for 5 minutes (a-b) and  $5 \text{ V cm}^{-1}$  for 10 minutes (c-d)

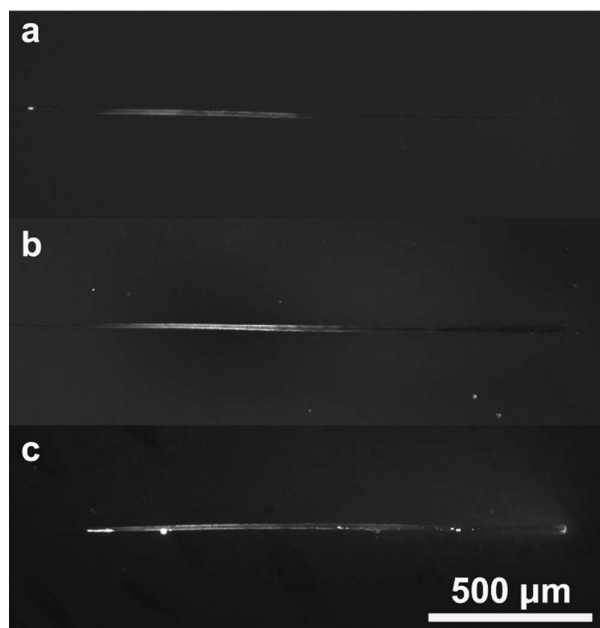

**Figure S5** The optical image of the thermoresponsive gel on carbon fiber at  $E = 5 \text{ V cm}^{-1}$  for 1 min and different concentration of KPS a)  $[\text{S}_2\text{O}_8^{2-}] = 0.015 \text{ M}$ , b)  $[\text{S}_2\text{O}_8^{2-}] = 0.030 \text{ M}$  and c)  $[\text{S}_2\text{O}_8^{2-}] = 0.045 \text{ M}$ .

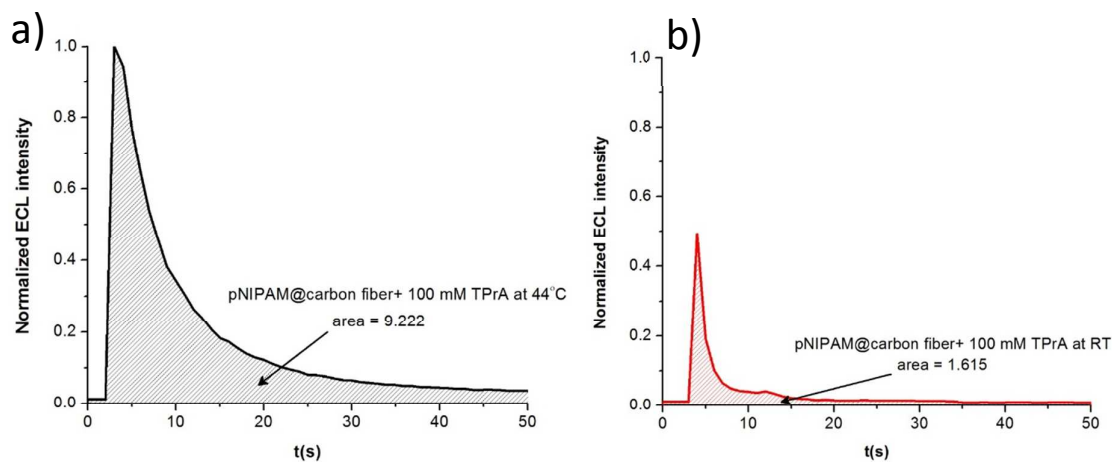

**Figure S6** : Calculation of the peak area of the normalized ECL intensity curves. a) at  $44^\circ\text{C}$ , b) at room temperature
